# Supplementary material for: 3D porous carbon networks with highly dispersed SiOx by molecular-scale engineering toward stable lithium metal anodes
Source: Royal Society of Chemistry journal article supplement (doi:10.1039/c9cc01927h), 2019-01-01
Supplement: c9cc01927h1.pdf [file c9cc01927h1.pdf]

## Supporting Information

### **3D porous carbon networks with highly dispersed SiO<sub>x</sub> by molecular-scale engineering toward stable lithium metal anodes**

Zhitao Lu,‡ Shaohong Liu,‡ Chuanfa Li, Junlong Huang, Dingcai Wu, Ruowen Fu\*

Materials Science Institute, PCFM Lab and GDHPPC Lab, School of Chemistry, Sun Yat-sen University,  
Guangzhou 510275, P. R. China.

‡These authors have contributed equally to this work.

Email: cesfrw@mail.sysu.edu.cn

## **Experimental section**

### **1. Preparation of Br-modified CNT**

In a typical synthesis, pristine CNT (5.7 g) was added to a mixture of 65% HNO<sub>3</sub> (174 ml) and H<sub>2</sub>O (21 ml). The mixture was then reflux at 120 °C for 28 h after dispersed by ultrasonication for 30 min, producing carboxyl groups functionalized CNT (CNT-COOH). Subsequently, the CNT-COOH was suspended in 60 ml of thionyl chloride and stirred at 70 °C for 24 h to obtain carbonyl chloride group functionalized CNT (CNT-COCl). The CNT-COCl was then mixed with 120 mL of anhydrous glycol and stirred at 120 °C for 48 h to obtain hydroxyl group functionalized CNT (CNT-OH). Afterwards, the CNT-OH (1.4 g) was dispersed in a mixture of anhydrous trichloromethane (35 mL), 4-dimethylaminopyridine (0.1 g) and triethylamine (1.5 mL). The dispersion was sealed in a flask in an ice/water bath and flushed with N<sub>2</sub> and then a solution of 2-bromo-2-methylpropionyl bromide (1.44 mL) dissolved in anhydrous trichloromethane (15 mL) was added dropwise in 30 min. The reaction was maintained at 0 °C for 3 h and then at room temperature for 48 h to produce Br-modified CNT (CNT-Br).

### **2. Preparation of CNT-g-PTEPM**

First, methacryloxypropyl triethoxysilane (TEPM) was sealed in a bottle after flushing with N<sub>2</sub> for 15 min. Then, a Schlenk flask was charged with CNT-Br, CuBr, N,N,N',N'',N'''-pentamethyldiethylenetriamine (PMDETA) and tetrahydrofuran (8 mL) and stirred for 0.5 h under gentle N<sub>2</sub> purge. TEPM was pulled out with a syringe and injected rapidly into the Schlenk flask. The solution was bubbled with N<sub>2</sub> for another 0.5 h, sealed and settled into a water bath of 50 °C. After 12 h, the reaction was stopped by opening the flask and exposing catalysts to air, giving rise to CNT-g-PTEPM. The molar ratio of TEPM/CNT-Br/CuBr/PMDETA was 100/1/5/5. The polymerization time could be increased to 24 h to achieve CNT@SiO<sub>x</sub>-C with a higher content of SiO<sub>x</sub>.

### **3. Preparation of CNT@SiO<sub>x</sub>-C**

Gelation of CNT-g-PTEPM was carried out by adding CNT-g-PTEPM into a mixed solution of ethanol (30 mL), distilled water (5 mL) and chlorhydric acid (37%, 5mL). CNT-g-xPTEPM was obtained after gelating for 1 day. Finally, the CNT-g-xPTEPM was annealed at 800°C for 3h at a rate of 5°C min<sup>-1</sup> in flowing N<sub>2</sub>, producing the target sample of CNT@SiO<sub>x</sub>-C.

### **4. Structural characterizations**

The nanostructures of the samples were observed by Hitachi S-4800 scanning electron microscope (SEM) and JEOL JEM-1400 Plus transmission electron microscope (TEM). Thermogravimetric analysis (TGA)

was performed by using PerkinElmer PE Pyris1 TGA thermogravimetric analyzer. Powder X-ray diffraction (XRD) patterns were recorded on a D-MAX 2200 VPC diffractometer using Cu K radiation. X-ray photoelectron spectroscopy (XPS) measurements were carried out with a Thermo SCIENTIFIC ESCALAB 250Xi instrument. Fourier-transform infrared (FTIR) measurements of the samples were performed with IR spectroscopy (Bruker TENSOR 27), using KBr disk method.

## **5. Electrochemical characterizations**

The electrochemical performance of the samples was measured in 2032 coin cells. CNT@SiO<sub>x</sub>/C and PVDF with a weight ratio of 9:1 were mixed in NMP and then casted onto Cu foil to prepare work electrodes. The mass loading of CNT@SiO<sub>x</sub>/C in the typical electrode was around 0.5 mg cm<sup>-2</sup>. Bare Cu foil and CNT electrode were used as the control working electrode for comparison. CR2032 coin cells were assembled with Celgard separators, Li foil (0.5 mm) counter electrodes and 40 μL electrolyte of 1.0 M LiTFSI in a mixture of DOL and DME (1:1 by volume) with 1 wt% LiNO<sub>3</sub> additive in an Ar-filled glove box. The cells were first cycled from 0 to 1 V at 50 μA for 5 cycles to stabilize the SEI. After that, 1 mA h cm<sup>-2</sup> of Li was deposited onto the working electrode at a current density of 1 mA cm<sup>-2</sup>, followed by Li stripping away at the same current density with a cutoff voltage of 0.5 V. Typically, for the symmetrical cell test, 3 mA h cm<sup>-2</sup> of Li was first plated onto the current collectors at 0.5 mA cm<sup>-2</sup>, then the cells were cycled at the current density of 1 mA cm<sup>-2</sup> for 1 h in each half cycle.

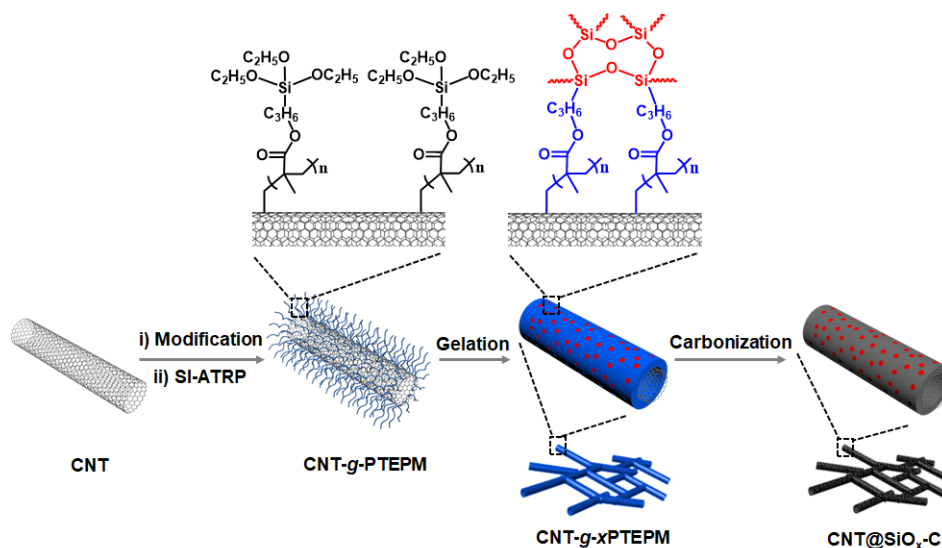

**Fig. S1** Schematic representation of the procedure to prepare CNT@SiO<sub>x</sub>-C.

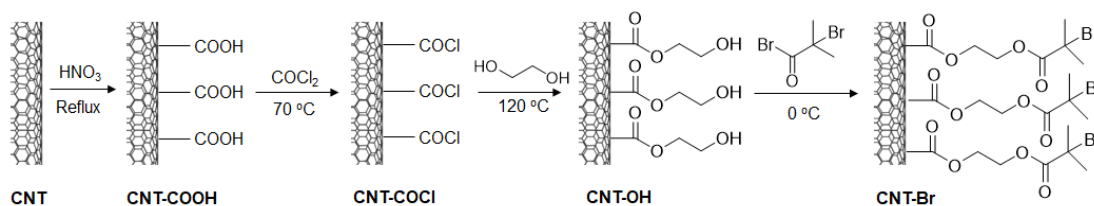

**Fig. S2** Schematic representation of the procedure to prepare Br-modified CNT.

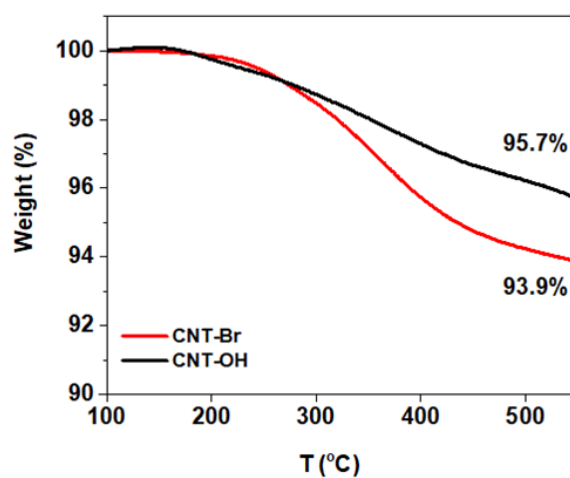

**Fig. S3** TGA curves of CNT-OH and CNT-Br.

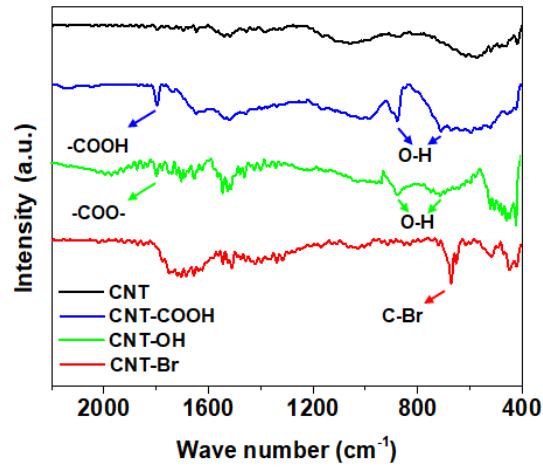

**Fig. S4** FTIR spectra of CNT, CNT-COOH, CNT-OH and CNT-Br. The band at 1797 and broad band at 1780-1625  $\text{cm}^{-1}$  are assigned to the carbonyl stretch of the carboxylic acid group and ester bond<sup>1</sup>. The bands at 872 and 772  $\text{cm}^{-1}$  are due to the O-H bending and out of phase O-H stretching<sup>2</sup>. The band observed at 670  $\text{cm}^{-1}$  corresponds to C-Br stretching vibration in CNT-Br<sup>3</sup>.

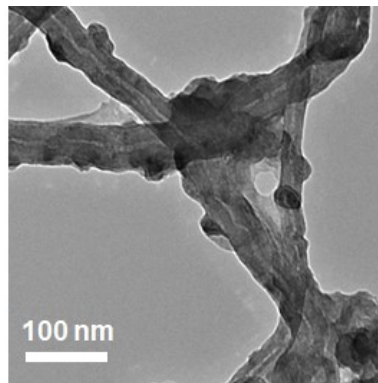

**Fig. S5** TEM image of CNT-g-xPTEPM, revealing the nanonetworked structure.

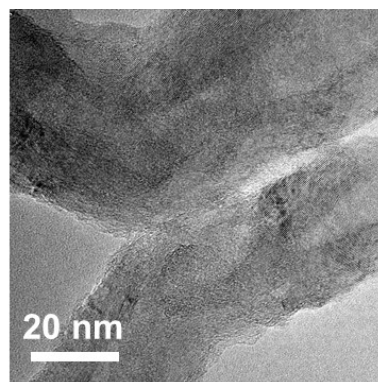

**Fig. S6** TEM image of CNT@SiO<sub>x</sub>-C.

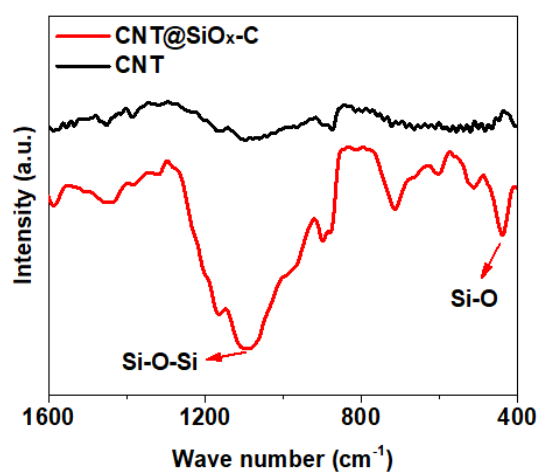

Fig. S7 FTIR spectra of the CNT@SiO<sub>x</sub>-C and CNT.

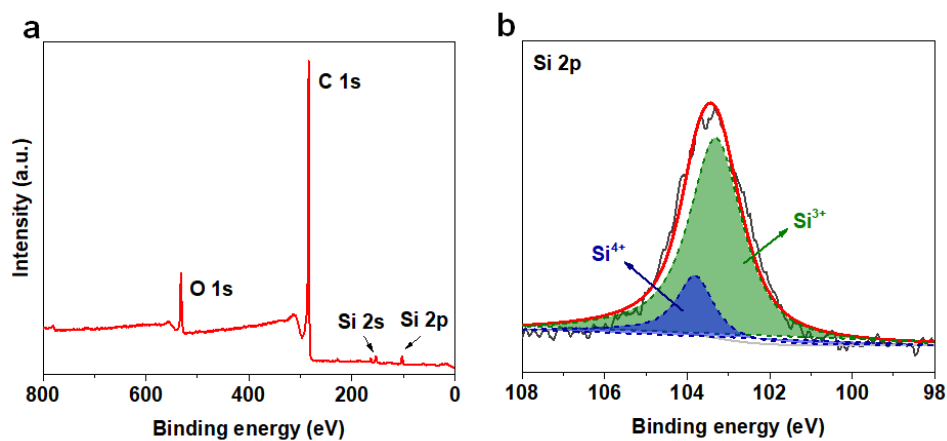

Fig. S8 (a) XPS full scan and (b) Si 2p high-resolution spectrum of CNT@SiO<sub>x</sub>-C.

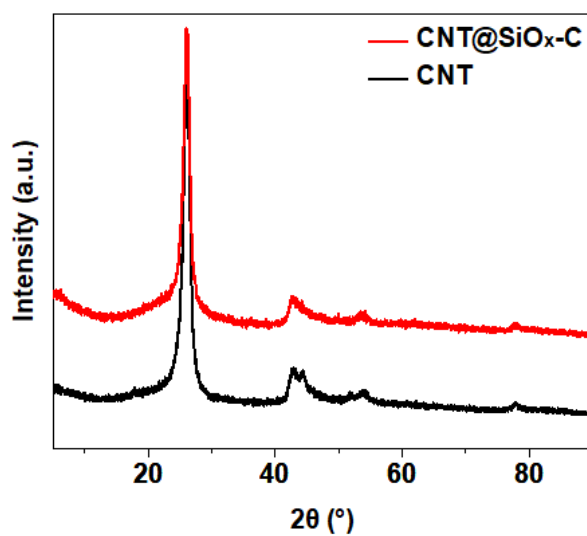

Fig. S9 XRD patterns of CNT@SiO<sub>x</sub>-C and CNT.

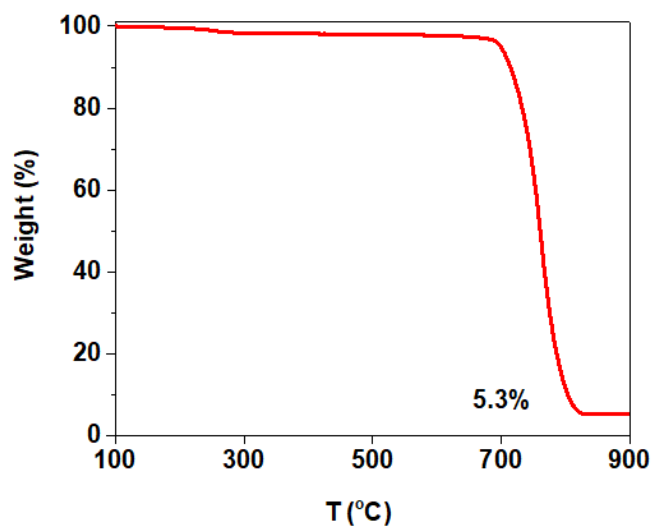

Fig. S10 TGA curve of synthesized CNT@SiO<sub>x</sub>-C. According to the XPS result (Fig. S8), the average valence state of Si is estimated to be  $\sim 3.16$  and the overall content of SiO<sub>x</sub> in the CNT@SiO<sub>x</sub>-C is calculated to be 4.7 wt%.

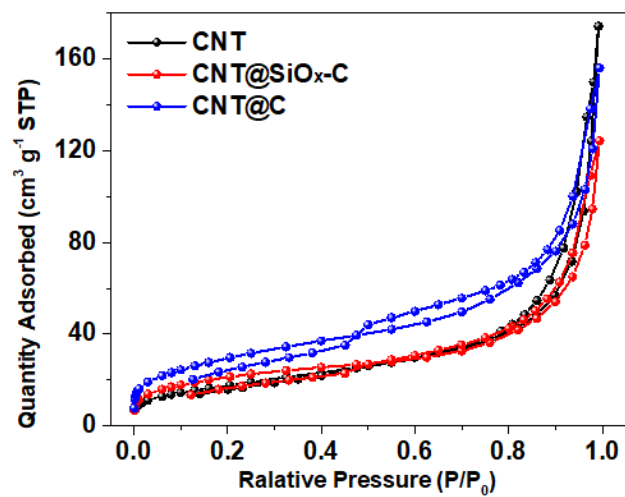

**Fig. S11** (a) N<sub>2</sub> adsorption–desorption isotherms of CNT, CNT@SiO<sub>x</sub>-C and CNT@C.

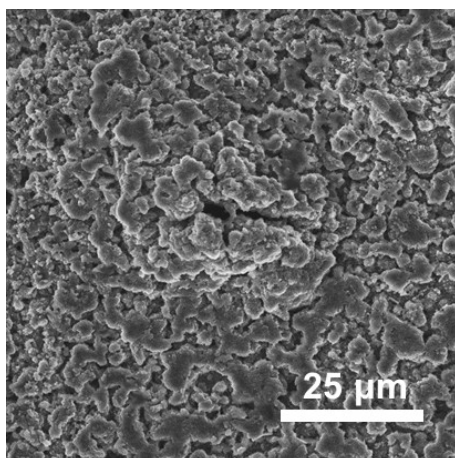

**Fig. S12** Top-view SEM image of Cu electrode after plating 1 mA h cm<sup>-2</sup> of Li.



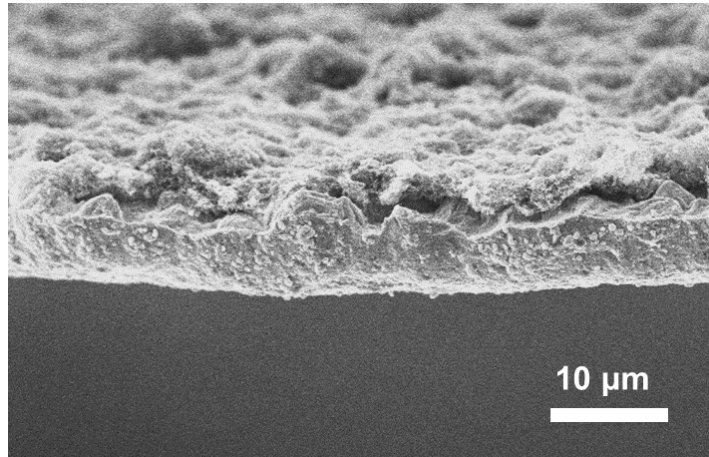

**Fig. S13** Cross-section SEM image of CNT@SiO<sub>x</sub>-C electrode.

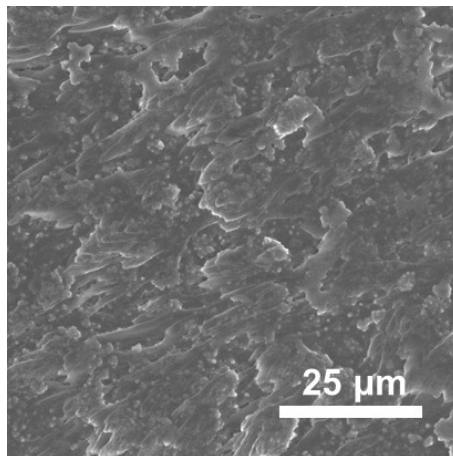

**Fig. S14** Top-view SEM image of CNT@SiO<sub>x</sub>-C electrode after plating 1 mA h cm<sup>-2</sup> of Li.

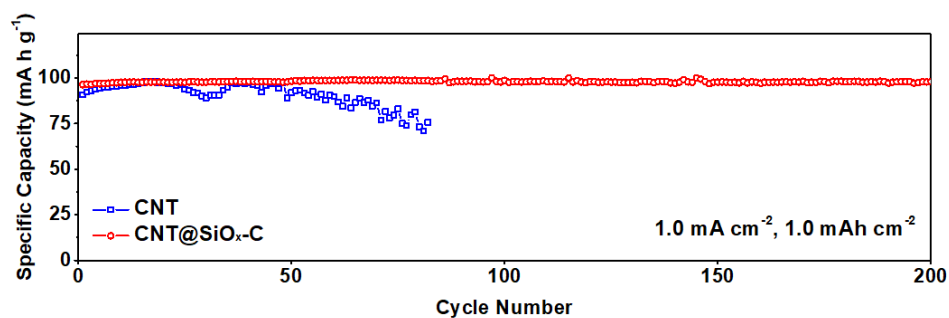

**Fig. S15** Coulombic efficiencies of CNT and CNT@SiO<sub>x</sub>-C electrodes with a capacity of 1 mA h cm<sup>-2</sup> at 1 mA cm<sup>-2</sup>.

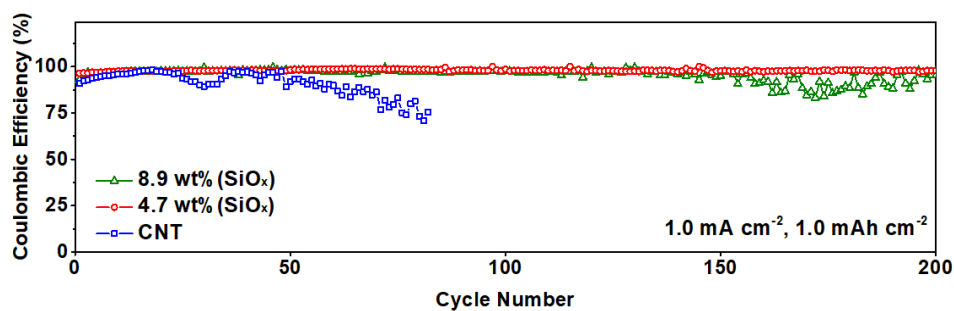

**Fig. S16** Coulombic efficiencies of CNT and CNT@SiO<sub>x</sub>-C electrodes with different contents of SiO<sub>x</sub> with a capacity of 1 mA h cm<sup>-2</sup> at 1 mA cm<sup>-2</sup>. The CNT@SiO<sub>x</sub>-C with 8.9 wt% of SiO<sub>x</sub> is prepared by increasing the polymerization time of TEPM to 24 h.

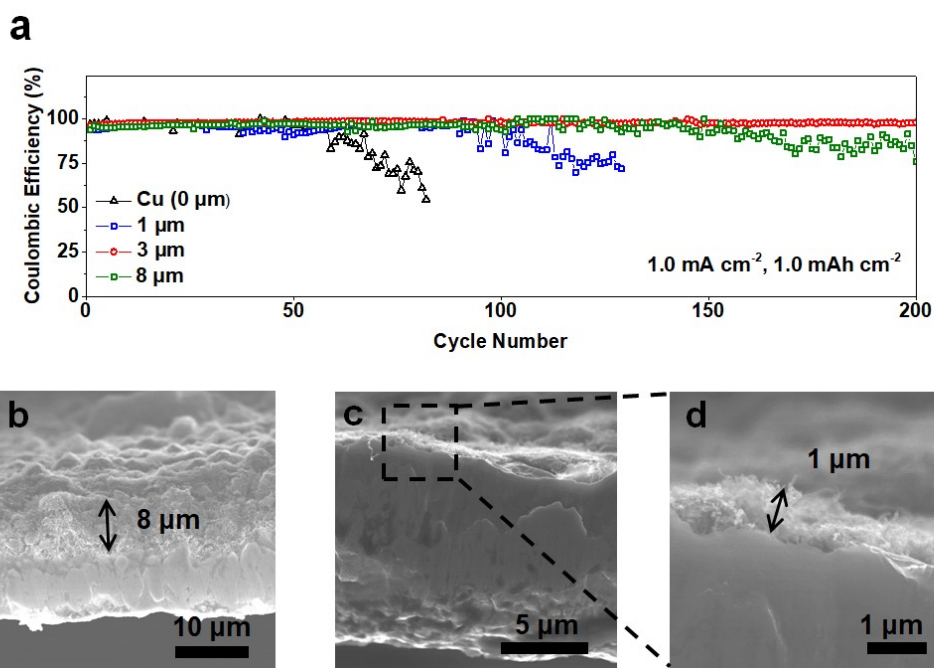

**Fig. S17** (a) Coulombic efficiencies of CNT@SiO<sub>x</sub>-C electrodes with different thicknesses of CNT@SiO<sub>x</sub>-C layers on the Cu foil with a capacity of 1 mA h cm<sup>-2</sup> at 1 mA cm<sup>-2</sup>. Cross-section SEM images of CNT@SiO<sub>x</sub>-C electrodes with different thicknesses of CNT@SiO<sub>x</sub>-C layers: (b) 8 μm and (c, d) 1 μm. Coating an ultrathin layer of CNT@SiO<sub>x</sub>-C (1 μm) can substantially increase the Li plating and stripping stability, indicating the great advantage of CNT@SiO<sub>x</sub>-C as 3D host for dendrite-free Li deposition. Notably, further increasing the thickness of CNT@SiO<sub>x</sub>-C from 3 to 8 μm can cause the deposition of Li on the surface of CNT@SiO<sub>x</sub>-C and thus result in poor Li plating/stripping efficiencies<sup>4</sup>.

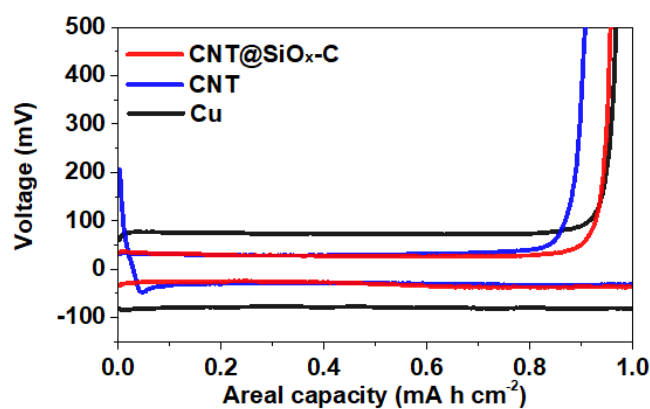

**Fig. S18** The first galvanostatic cycling profiles of CNT@SiO<sub>x</sub>-C, CNT and Cu electrodes at a current density of 1 mA cm<sup>-2</sup>.

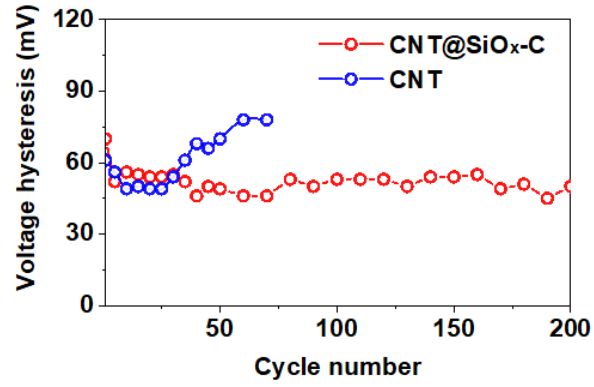

**Fig. S19** Voltage hysteresis of Li plating/stripping with CNT and CNT@SiO<sub>x</sub>-C electrodes.

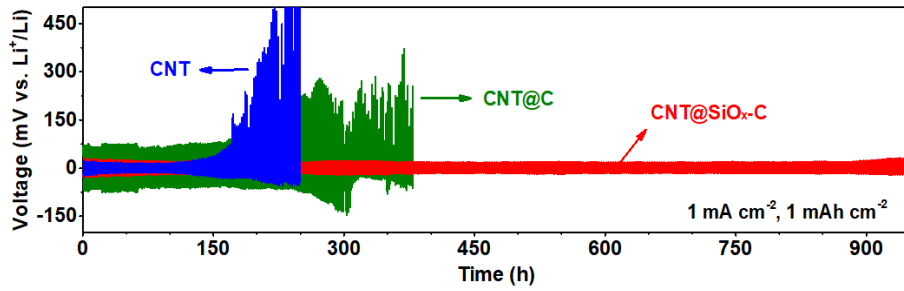

**Fig. S20** Voltage–time profiles of the Li plating/stripping process with a cycling capacity of 1 mA h cm<sup>-2</sup> at 1 mA cm<sup>-2</sup> in symmetric Li|Li@CNT, Li|Li@CNT@C and Li|Li@CNT@SiO<sub>x</sub>-C cells.

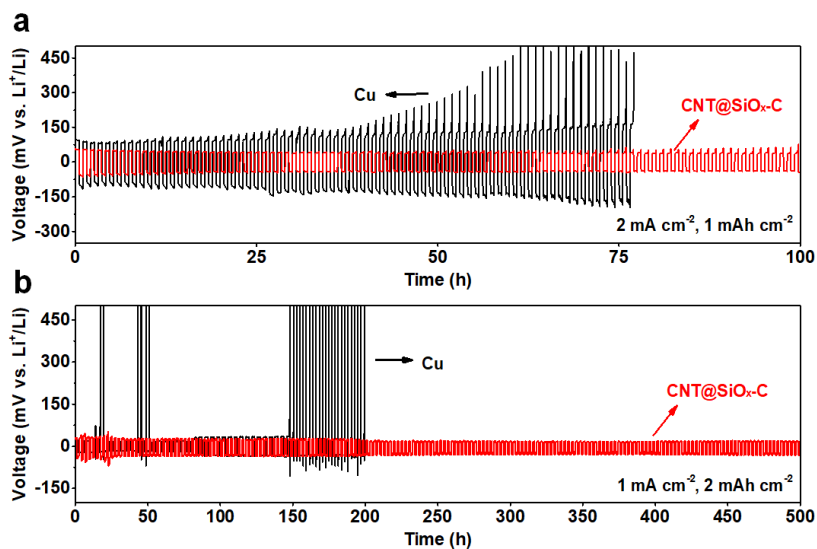

**Fig. S21** Voltage–time profiles of the Li plating/stripping process with a cycling capacity of (a) 1 mA h cm<sup>-2</sup> at 2 mA cm<sup>-2</sup> and (b) 2 mA h cm<sup>-2</sup> at 1 mA cm<sup>-2</sup> in symmetric Li|Li@Cu and Li|Li@CNT@SiO<sub>x</sub>-C cells.

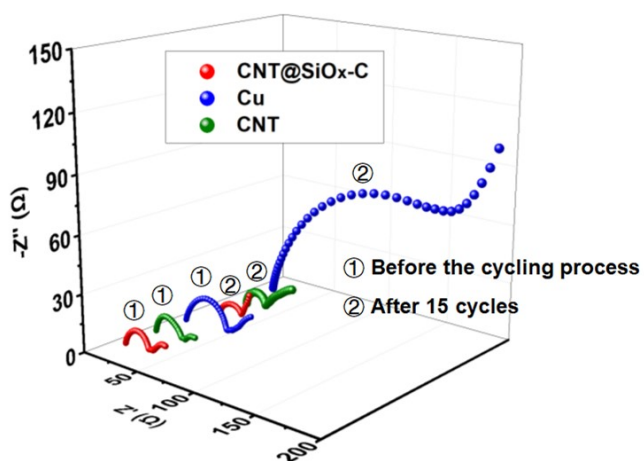

**Fig. S22** Impedance spectra of the symmetric cells assembled with CNT@SiO<sub>x</sub>-C, bare Cu and CNT electrodes before the cycling process and after 15 cycles.

**Table S1.** Electrochemical performance of the symmetric Li|Li@CNT@SiO<sub>x</sub>-C cell in comparison with the previously reported Li hosts with large-sized lithiophilic species and other strategies for Li metal anodes

| Strategies                   | Materials                                             | Current density (mA cm <sup>-2</sup> ) | Overpotential, (mV) | Time (h)   | References       |
|------------------------------|-------------------------------------------------------|----------------------------------------|---------------------|------------|------------------|
| 3D porous scaffolds          | <b>CNT@SiO<sub>x</sub>-C</b>                          | <b>1.0</b>                             | <b>40</b>           | <b>950</b> | <b>This work</b> |
|                              | BNL (SiO <sub>2</sub> )                               | 1.0                                    | 86                  | 700        | 5                |
|                              | LCNE (SiO)                                            | 1.0                                    | 64                  | 200        | 6                |
|                              | PI-ZnO matrix (ZnO)                                   | 1.0                                    | 70                  | 200        | 7                |
|                              | Co-CS composite (Co <sub>3</sub> O <sub>4</sub> )     | 1.0                                    | 100                 | 800        | 8                |
|                              | cellular graphene scaffold                            | 1.0                                    | 100                 | 200        | 9                |
|                              | Li/Al <sub>4</sub> Li <sub>9</sub> -LiF nanocomposite | 1.0                                    | 90                  | 50         | 10               |
| Electrolyte additives        | LiF                                                   | 0.5                                    | 374                 | 600        | 11               |
|                              | SiCl <sub>4</sub>                                     | 1.0                                    | 128                 | 100        | 12               |
| Separators                   | glass fiber cloths                                    | 1.0                                    | 78                  | 160        | 13               |
|                              | Al-coated garnet solid-state electrolyte separator    | 0.1                                    | 56                  | 40         | 14               |
|                              | PEO-LiTFSI-LLZO solid-state electrolyte separator     | 0.2                                    | 60                  | 800        | 15               |
| Artificial protective layers | polymeric grafted skin                                | 0.5                                    | 60                  | 300        | 16               |
|                              | nanodiamonds                                          | 1.0                                    | 100                 | 200        | 17               |
|                              | organic-inorganic dual-layered interface              | 1.0                                    | 98                  | 120        | 18               |
|                              | LiF-coating layers                                    | 1.0                                    | 120                 | 600        | 19               |

## References

1. (a) I. V. Pavlidis, T. Tsoufis, A. Enotiadis, D. Gournis and H. Stamatis, *Adv. Eng. Mater.*, 2010, **12**, B179-B183; (b) L. Li, J. L. Davidson and C. M. Lukehart, *Carbon*, 2006, **44**, 2308-2315; (c) Z. Liu, S. Zhu, Y. Li, Y. Li, P. Shi, Z. Huang and X. Huang, *Polym. Chem-UK*, 2015, **6**, 311-321; (d) P. Kar and A. Choudhury, *Sensor Actuat. B-Chem.*, 2013, **183**, 25-33.
2. C. Y. Panicker, H. T. Varghese and D. Philip, *Spectrochim. Acta A*, 2006, **65**, 802-804.
3. (a) M. Karabacak, A. Çoruh and M. Kurt, *J. Mol. Struct.*, 2008, **892**, 125-131; (b) S. Ramalingam, P. Anbusrinivasan and S. Periandy, *Spectrochim. Acta A*, 2011, **78**, 826-834; (c) J. Swaminathan, M. Ramalingam, H. Saleem, V. Sethuraman and M. N. Ameen, *Spectrochim. Acta A*, 2009, **74**, 1247-1253.
4. H. Zhang, X. Liao, Y. Guan, Y. Xiang, M. Li, W. Zhang, X. Zhu, H. Ming, L. Lu and J. Qiu, *Nat. Commun.*, 2018, **9**, 3729.
5. S. Liu, L. Deng, W. Guo, C. Zhang, X. Liu and J. Luo, *Adv. Mater.*, 2019, **31**, e1807585.
6. D. C. Lin, J. Zhao, J. Sun, H. B. Yao, Y. Y. Liu, K. Yan and Y. Cui, *Proc. Natl. Acad. Sci. USA.*, 2017, **114**, 4613-4618.
7. Y. Y. Liu, D. C. Lin, Z. Liang, J. Zhao, K. Yan and Y. Cui, *Nat. Commun.*, 2016, **7**, 10992.
8. S. Li, Q. Liu, J. Zhou, T. Pan, L. Gao, W. Zhang, L. Fan and Y. Lu, *Adv. Funct. Mater.*, 2019, 1808847.
9. W. Deng, X. F. Zhou, Q. L. Fang and Z. P. Liu, *Adv. Energy Mater.*, 2018, **8**, 1703152.
10. H. S. Wang, D. C. Lin, Y. Y. Liu, Y. Z. Li and Y. Cui, *Sci. Adv.*, 2017, **3**, e1701301.
11. Y. Y. Lu, Z. Y. Tu and L. A. Archer, *Nat. Mater.*, 2014, **13**, 961-969.
12. L. Fan, H. L. Zhuang, W. D. Zhang, Y. Fu, Z. H. Liao and Y. Y. Lu, *Adv. Energy Mater.*, 2018, **8**, 1703360.
13. X. B. Cheng, T. Z. Hou, R. Zhang, H. J. Peng, C. Z. Zhao, J. Q. Huang and Q. Zhang, *Adv. Mater.*, 2016, **28**, 2888-2895.
14. K. K. Fu, Y. H. Gong, B. Y. Liu, Y. Z. Zhu, S. M. Xu, Y. G. Yao, W. Luo, C. W. Wang, S. D. Lacey, J. Q. Dai, Y. N. Chen, Y. F. Mo, E. Wachsman and L. B. Hu, *Sci. Adv.*, 2017, **3**, e1601659.

15. C. Z. Zhao, X. Q. Zhang, X. B. Cheng, R. Zhang, R. Xu, P. Y. Chen, H. J. Peng, J. Q. Huang and Q. Zhang, *Proc. Natl. Acad. Sci. USA.*, 2017, **114**, 11069-11074.
16. Y. Gao, Y. M. Zhao, Y. G. C. Li, Q. Q. Huang, T. E. Mallouk and D. H. Wang, *J. Am. Chem. Soc.*, 2017, **139**, 15288-15291.
17. X. B. Cheng, M. Q. Zhao, C. Chen, A. Pentecost, K. Maleski, T. Mathis, X. Q. Zhang, Q. Zhang, J. J. Jiang and Y. Gogotsi, *Nat. Commun.*, 2017, **8**, 336.
18. C. Yan, X. B. Cheng, Y. Tian, X. Chen, X. Q. Zhang, W. J. Li, J. Q. Huang and Q. Zhang, *Adv. Mater.*, 2018, **30**, 1707629.
19. J. Zhao, L. Liao, F. F. Shi, T. Lei, G. X. Chen, A. Pei, J. Sun, K. Yan, G. M. Zhou, J. Xie, C. Liu, Y. Z. Li, Z. Liang, Z. N. Bao and Y. Cui, *J. Am. Chem. Soc.*, 2017, **139**, 11550-11558.
